# Supplementary material for: Study protocol and baseline characteristics of newly induced dialysis patients: a prospective multi-center cohort study with biological sample bank, the Ibaraki Dialysis Initiation Cohort Study (iDIC Study)
Source: Research Square preprint supplement (doi:10.21203/rs.3.rs-445317/v1), 2021-05-07
Supplement: Supplementary file 1 [file fef6d0e35b391004e84f2a57.docx]

Supplementary appendix

Research Committee of Ibaraki Dialysis Initiation Cohort study: In addition to the authors, the following investigators and institutions participated in this study: Department of Nephrology, Tokyo Medical University Ibaraki Medical Center (Dr. Masaki Kobayashi); Nephrology Division, Department of Internal Medicine, JA Toride Medical Center (Dr. Yoshitaka Maeda); Department of Nephrology, Ibaraki Prefectural Central Hospital (Dr. Hiroaki Kobayashi); Moriya Keiyu Hospital (Dr. Tokuro Kobayashi); Department of Nephrology, Hitachi General Hospital (Dr. Atsushi Ueda); Tsuchida Naika Hinyoukika Clinic (Dr. Makoto Tsuchida); Ohta Nephro Clinic (Dr. Makoto Tsuchida); Department of Nephrology, Ushiku Aiwa General Hospital (Dr. Hideko Nakamura); Department of Nephrology, Tsukuba Gakuen Hospital (Dr. Kenji Takada); Department of Surgery, National Hospital Organization Mito Medical Center (Dr. Koichi Kozaki); Department of Internal Medicine, Kensei General Hospital (Dr. Satoshi Iwabuchi); Department of Nephrology, Ibaraki Seinan Medical Center Hospital (Dr. Tadashi Iitsuka); Department of Nephrology, Mito Kyodo General Hospital (Dr. Kenta Nishiki); Department of Surgery, Kamisu Saiseikai Hospital (Dr. Hideaki Takasaki); Department of Internal Medicine, Mito Red Cross Hospital (Dr. Takashi Takita); Department of Nephrology, Hitachinaka General Hospital (Dr. Masami Nakajima); Division of Nephrology, Koga Red Cross Hospital (Dr. Sumiko Honma); Chikusei Kidney Clinic (Dr. Youichi Akai); Ishizuka Clinic (Dr. Genzou Ishizuka); Isshiki Clinic (Dr. Koichi Issiki); Kawashima Medical Clinic (Dr. Takako Saito); Iwamoto Clinic (Dr. Hitoshi Iwamoto); Ohishi Naika Clinic (Dr. Akira Ohishi); Tokiwa Clinic (Dr. Masakazu Ohtsuka); Mito Chuo Hospital (Dr. Atsushi Ono); Mito Chuo Clinic (Dr. Hidehiko Kashiwabara); Tajirigaoka Hospital (Dr. Takuro Kanekawa); Department of Internal Medicine, Sannoudai Hospital (Dr. Naoaki Kanamori); Medical Corporation Kamome Hitachi Clinic (Dr. Fumika Kaneda); Kikuchi Naika Clinic (Dr. Hiroshi Kikuchi); Tsukuba Jin Clinic (Dr. Masashi Kubo); Sumiyoshi Clinic Hospital (Dr. Hiromi Kurosawa); Katsuta Hospital (Dr. Takeshi Shiraishi); Shiigai Clinic (Dr. Tatsuo Shiigai); Shima Iin (Dr. Masayoshi Shima); Okubo Hospital (Dr. Tokuo Takahashi); Naka Clinic (Dr. Hideki Matsukawa); Hitachi Clinic (Dr. Minoru Tokoi); Yuki Clinic (Dr. Sadao Tsunematsu); Sakura Mito Clinic (Dr. Atsushi Tsuruta); Kitaibaraki Chuo Clinic (Dr. Masao Deguchi); Tsukuba Gakuen Clinic (Dr. Masahiro Hayakawa); Mitsukaido Sakura Hospital (Dr. Makoto Hiroi); Maeda Hospital (Dr. Nobuki Maeda); Kandatsu Hospital (Dr. Takanobu Hoshino); Yamaguchi Clinic (Dr. Tetsu Yamaguchi); Tsuchiura Beryl Clinic (Dr. Kota Yamada); Central Jin Clinic (Dr. Takashi Ishizu); Midorino Clinic (Dr. Atsushi Takeda); Moriyaekimae Clinic (Dr. Ikuo Takahashi); Department of Internal Medicine, Namegata District General Hospital (Dr. Takamichi Yuhara); Kenpoku Medical Center Takahagi Kyodo Hospital (Dr. Tadashi Kondo); Ohba Renal Clinic (Dr. Syoji Ooba); Kobuki Naika (Dr. Yasunobu Ogura); Tachibana Clinic (Dr. Hisaya Tachibana); Tonegawabashi Clinic (Dr. Hiroshi Ookawa); Fujii Hospital (Dr. Toshihiro Fujii).
